# Supplementary material for: Clinical Characteristics of 18 Patients with Psoriasis and Multiple Myeloma Identified Through Digital Health Crowdsourcing
Source: Springer Nature journal article supplement (doi:10.1007/s13555-020-00416-5), 2020-07-07
Supplement: MOESM1 [file 18155074]

**Supplementary Materials**

**Table S1: Survey questions administered to patients.** The questionnaire was administered to patients via HealthTree, a platform that allows patients to navigate myeloma over the lifetime of their disease. *FR*, free response; *MGUS*, monoclonal gammopathy of undetermined significance; *MM*, multiple myeloma; *M*, male; *F*, female.

| Question | | Response Field |
| --- | --- | --- |
| 1. | Gender | M, F, Non-binary |
| 2. | Age | FR (number) |
| 3. | Has a doctor diagnosed you with psoriasis? | Yes, No |
| 4. | At what age did your psoriasis first appear? | FR (number) |
| 5. | What type of psoriasis do you have? | [Select 1+]: Guttate, Plaque, Palm/Sole, Inverse, Other (FR) |
| 6. | How much of your body is currently covered by psoriasis? | [Select]: < 1% (none or very little), 1-5% (few areas that could be covered by 1-5 palms of your hand), > 5% (could be covered by 5-10 palms of your hand) |
| 7. | How much of your body would be covered by psoriasis without any psoriasis treatments? | [Select]: < 1% (none or very little), 1-5% (few areas that could be covered by 1-5 palms of your hand), > 5% (could be covered by 5-10 palms of your hand) |
| 8. | What treatments are you currently using for your psoriasis? | FR |
| 9. | What treatments have you used in the past for psoriasis? | FR |
| 10. | Did any of your psoriasis treatments improve your myeloma? | Yes, No |
| 11. | Did any of your psoriasis treatments worsen your myeloma? | Yes, No |
| 12. | At what age was your myeloma diagnosed? | FR (number) |
| 13. | What type of myeloma(s) are you diagnosed with? | [Select 1+]: Smoldering, MGUS, MM, Other (FR) |
| 14. | What were the genetic features of your myeloma at diagnosis? | FR |
| 15. | What are the genetic features of your myeloma now? | FR |
| 16. | What type of MM (kappa, lambda) were you diagnosed with? | FR |
| 17. | Have you experienced any bone damage? | Yes, No |
| 18. | Have you experienced hypercalcemia? | Yes, No |
| 19. | Have you been diagnosed with osteopenia? | Yes, No |
